# Supplementary material
Source: Springer Nature journal article supplement (https://www.springermedizin.de/resource/supplementary/12962_2012_153_MOESM2_ESM.pdf/9571812)
Supplement: MOESM2 [file 9571812]

*Records identified through database searching  
(n= 2903)*

*Additional records identified through other sources  
(n= 243)*

*Records after duplicates removed (n=3146)*

*Records retained after screening  
by abstract (n=1500)*

*Records excluded  
(n=1646)\**

*Full-text articles assessed for  
eligibility (n= 364)*

*Full-text articles excluded  
(n= 1136)\**

*Studies included in the literature  
review (n=40)*
